# Supplementary material for: Visual Cortex Engagement in Retinitis Pigmentosa
Source: Int J Mol Sci. 2021 Aug 30;22(17):9412. doi: 10.3390/ijms22179412 (PMC8431500; doi:10.3390/ijms22179412)
Supplement: Supplementary file 1 [file ijms-22-09412-s001.zip › ijms-1326926-supplementary.pdf]

Fig. S1

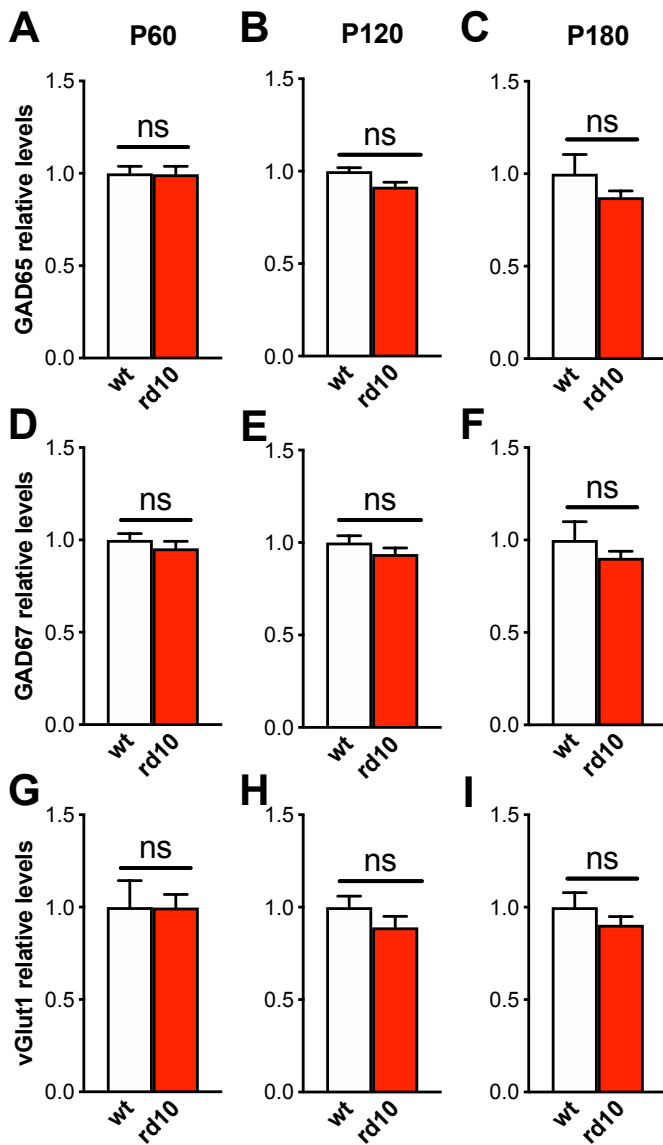

**Figure S1. GABA synthesis and glutamatergic intracortical neurotransmission are not changed in the visual cortex of rd10 animals.** Diagrams show the percentage value of protein expression in rd10 visual cortex in relation to the control (wt) group. No difference was present in GAD65 (P60: t-test  $p = 0.937$ , P120: t-test  $p = 0.110$ , P180: Mann-Whitney Rank Sum Test  $p = 0.461$ ; **A-C**), GAD67 ( P60: t-test  $p = 0.390$ , P120: t-test  $p = 0.217$ , P180: t-test  $p = 0.280$ ; **D-F**) and vGlut1 (P60: t-test  $p = 0.992$ , P120: t-test  $p = 0.220$ , P180: t-test  $p = 0.283$ ; **G-I**) protein expression at any age tested. These additional presynaptic markers have been tested in the same samples used for vGAT and vGlut2. Data are expressed as mean  $\pm$  s.e.m. ns: not significant.

Fig. S2

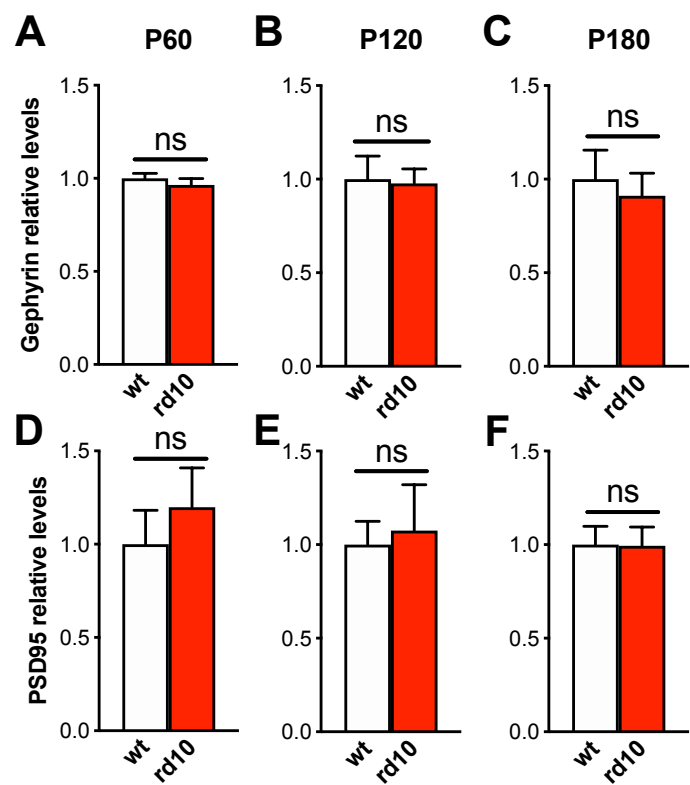

**Figure S2. Regular expression of scaffold proteins at the postsynaptic density in the visual cortex of rd10 mice.** Diagrams show the percentage value of protein amount in rd10 visual cortex in relation to the control (wt) group. No difference was present in gephyrin (P60: Mann-Whitney Rank Sum Test  $p = 0.234$ , P120: Mann-Whitney Rank Sum Test  $p = 0.798$ , P180: t-test  $p = 0.168$ ; **A-C**) and PSD95 (P60: t-test  $p = 0.390$ , P120: t-test  $p = 0.217$ , P180: t-test  $p = 0.280$ ; **D-F**) protein levels at any age tested. These postsynaptic markers have been tested in the same samples used for presynaptic proteins. Data are expressed as mean  $\pm$  s.e.m. ns: not significant.

**Fig. S3**

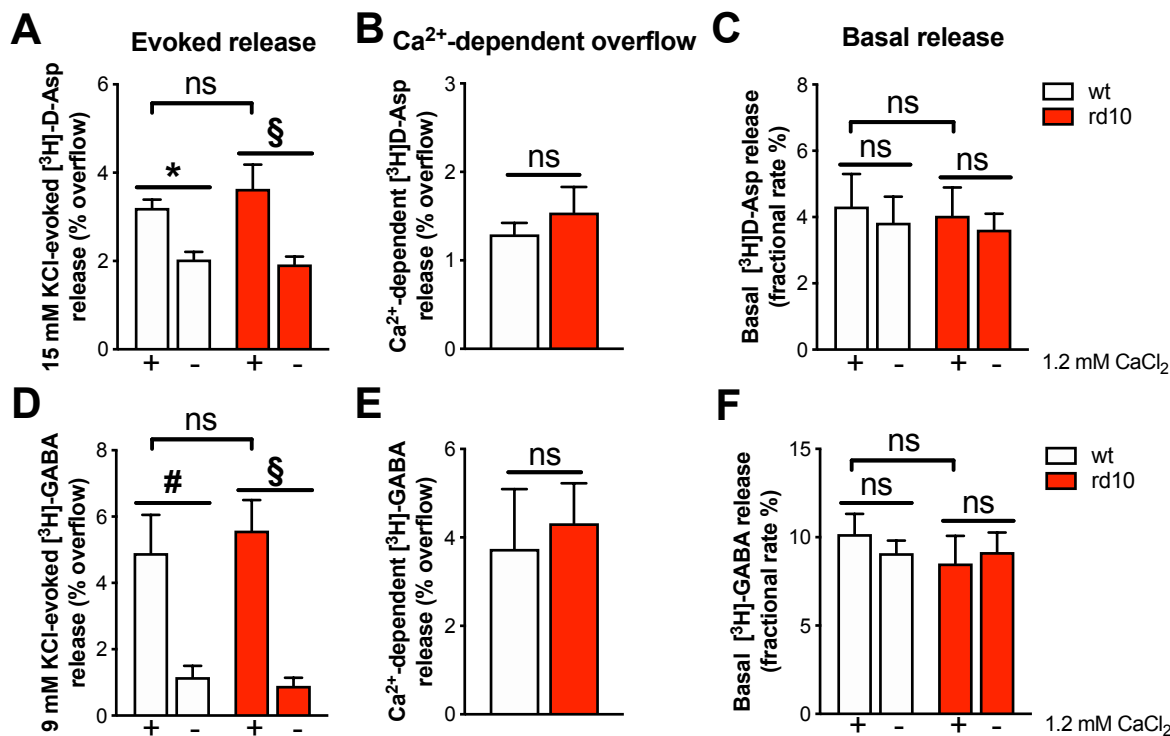

**Figure S3. Release of glutamate and GABA from synaptosomes of rd10 visual cortex at P180.** Synaptosomes were purified from the visual cortex of P180 wt and rd10 mice. Data are expressed as mean  $\pm$  s.e.m. of 5-7 independent experiments run in triplicate. **(A)** 15 mM KCl-evoked [<sup>3</sup>H]D-Asp overflow was unchanged in the visual cortex of rd10 mice (Two-way RM ANOVA). Ca<sup>2+</sup> lack reduces Asp release in both wt (Two-way RM ANOVA, post hoc Bonferroni test,  $p < 0.05$ ) and rd10 animals ( $p < 0.001$ ). **(B)** Ca<sup>2+</sup>-dependent stimulus-evoked [<sup>3</sup>H]D-Asp overflow was not modified in rd10 visual cortex (t-test). **(C)** [<sup>3</sup>H]D-Asp basal release was not affected by rd10 mutation (Two-way RM ANOVA). **(D)** 9 mM KCl-evoked [<sup>3</sup>H]-GABA overflow was unaltered in the visual cortex of rd10 mice (Two-way RM ANOVA). Ca<sup>2+</sup> removal strongly affects GABA release in both wt (Two-way RM ANOVA, post hoc Bonferroni test,  $p < 0.01$ ) and rd10 animals ( $p < 0.001$ ). **(E)** Ca<sup>2+</sup>-dependent stimulus-evoked [<sup>3</sup>H]-GABA overflow was similar in wt and rd10 visual cortex (t-test). **(F)** [<sup>3</sup>H]-GABA basal release was not different in rd10 mice compared to wt (Two-way RM ANOVA). \*  $p < 0.05$ , #  $p < 0.01$ , §  $p < 0.001$ , ns: not significant.

**Fig. S4**

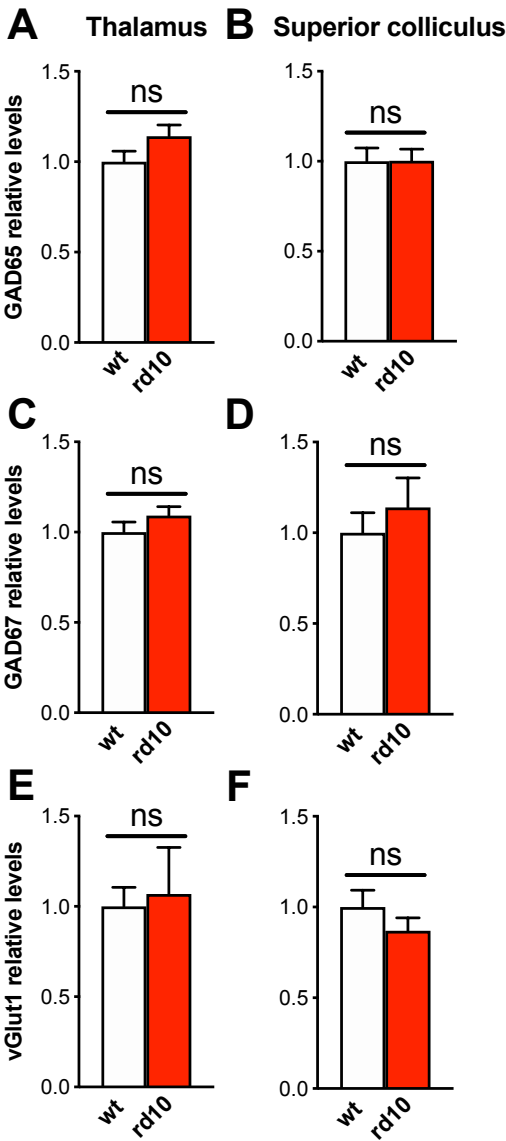

**Figure S4. GABA synthesis and glutamatergic neurotransmission from the cortex are not changed in the lateral geniculate nucleus (LGN) and in the superior colliculus (SC) of rd10 animals at P60.** Diagrams show the average percentage value of protein expression in rd10 thalamus and superior colliculus with respect to the control (wt) group. No difference was present in GAD65 (LGN: t-test  $p = 0.121$ , SC: t-test  $p = 0.979$ ; **A,B**), GAD67 (LGN: t-test  $p = 0.248$ , SC: t-test  $p = 0.490$ ; **C,D**) and vGlut1 (LGN: t-test  $p = 0.799$ , SC: t-test  $p = 0.284$ ; **E,F**) protein expression at P60. These additional presynaptic markers have been tested in the same samples used for vGAT and vGlut2. Data are expressed as mean  $\pm$  s.e.m. ns: not significant.
